# Supplementary material for: Synthesis and Characterization of Curcumin-Loaded Nanoparticles of Poly(Glycerol Sebacate): A Novel Highly Stable Anticancer System
Source: MDPI journal article supplement (doi:10.3390/molecules27206997), 2022-10-18
Supplement: s1 [file s1]

## Supporting Information

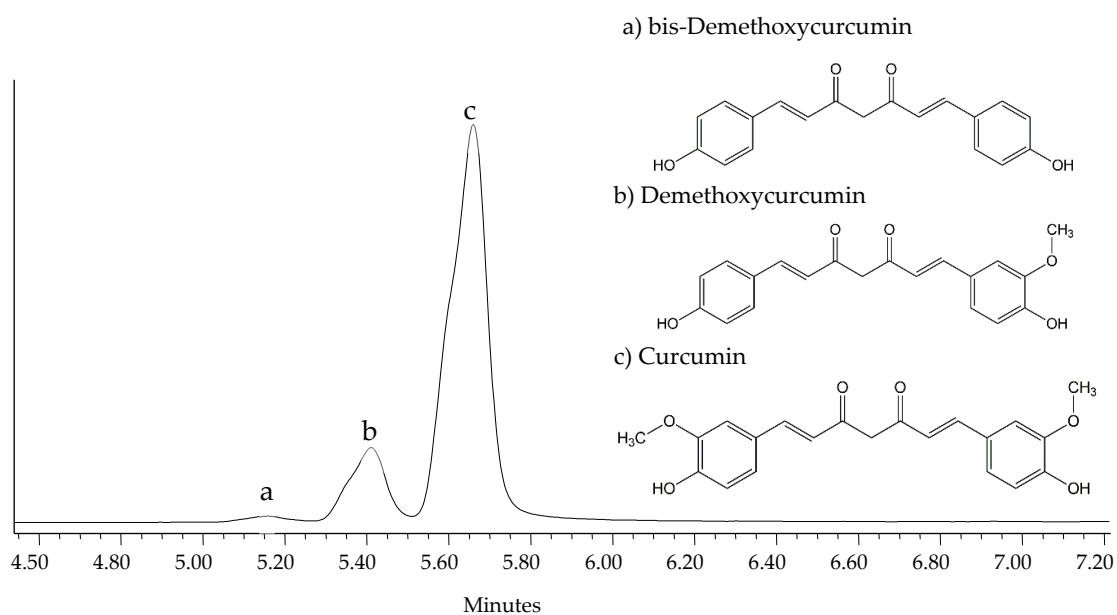

**Figure S1.** UPLC chromatogram of curcumin extract recorded at 445 nm. Inset: a) bis-Demethoxycurcumin, b) Demethoxycurcumin, c) Curcumin chemical structures.

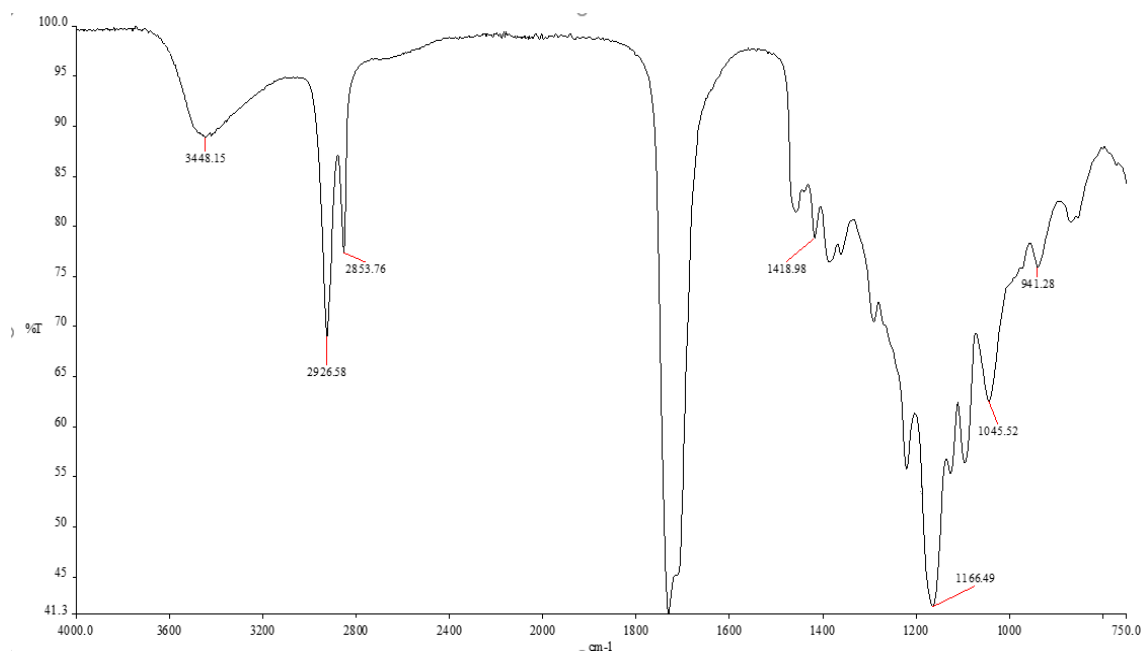

**Figure S2.** FT-IR spectrum of PGS

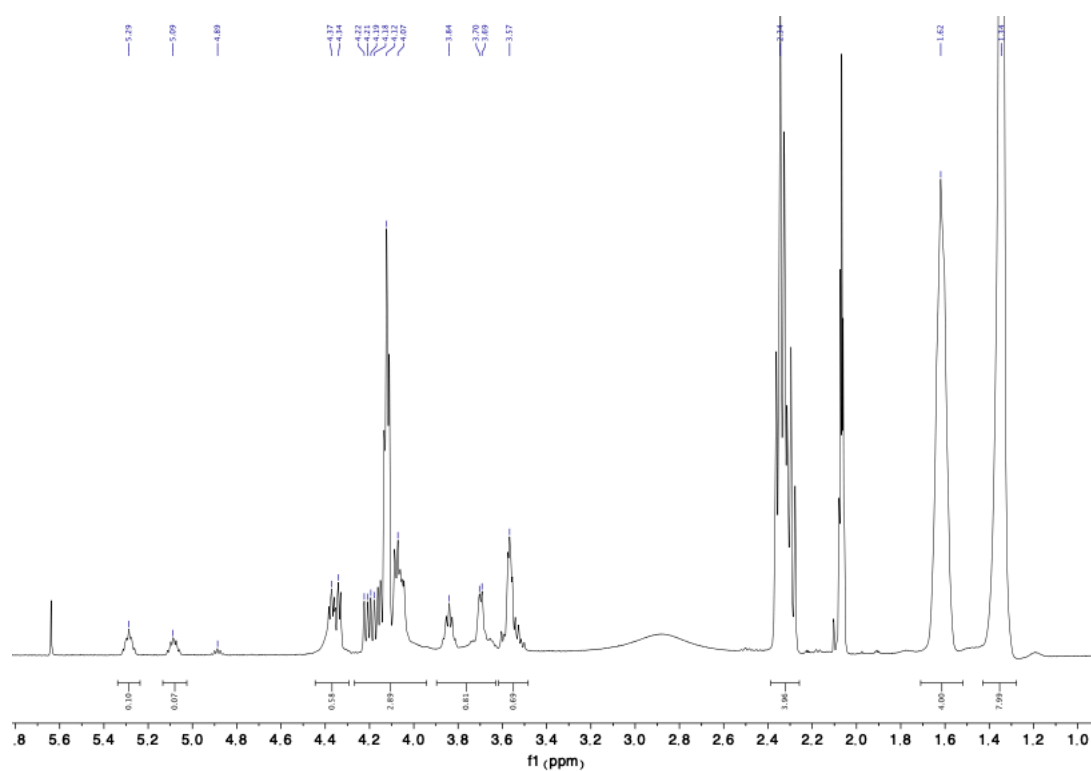

**Figure S3.** <sup>1</sup>H NMR spectrum of PGS

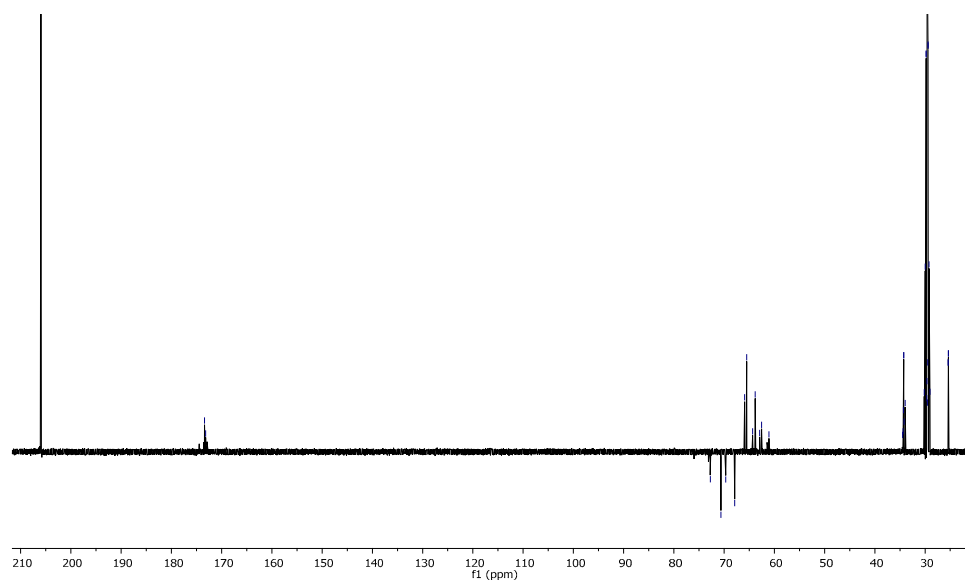

**Figure S4.** <sup>13</sup>C APT NMR spectrum of PGS

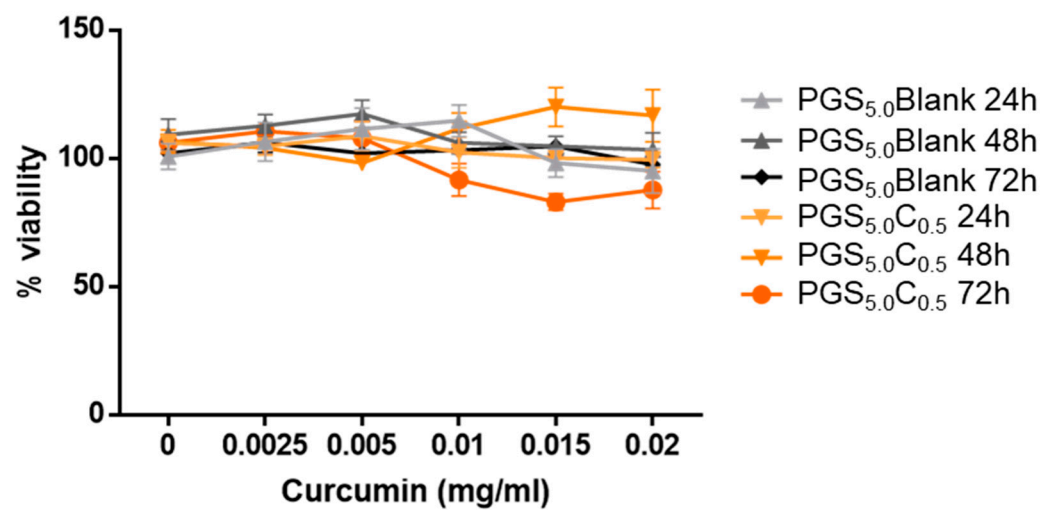

**Figure S5.** Cytotoxicity assay in NIH-3T3 cells with different concentrations of PGS<sub>5.0</sub>Blank and PGS<sub>5.0</sub>C<sub>0.5</sub> dissolved in sterile dH<sub>2</sub>O
